# Supplementary material for: Dual roles of underpotential deposition in the synthesis of tetrahexahedral Pd–Ag alloy nanocrystals
Source: Royal Society of Chemistry journal article supplement (doi:10.1039/d0cc06090a), 2020-01-01
Supplement: d0cc06090a1.pdf [file d0cc06090a1.pdf]

**Electronic Supplementary Information**

**Dual Roles of Underpotential Deposition in the Synthesis of**

**Tetrahexahedral Pd-Ag Alloy Nanocrystals**

*Haibo Bao,<sup>a,b</sup> Fengxia Wu,<sup>a</sup> Fenghua Li,<sup>a</sup> Ling Zhang,<sup>c</sup> Yali Yuan,<sup>d</sup> Guobao Xu,<sup>a,b</sup>*  
*Wenxin Niu<sup>\*,a,b</sup>*

<sup>a</sup> State Key Laboratory of Electroanalytical Chemistry, Changchun Institute of Applied Chemistry, Chinese Academy of Sciences, 5625 Renmin Street, Changchun, Jilin 130022, China

<sup>b</sup> University of Chinese Academy of Sciences, Beijing, 100039, China

<sup>c</sup> School of Science, Harbin Institute of Technology, Shenzhen, 518055, China

<sup>d</sup> College of Chemistry and Bioengineering, Guilin University of Technology, Guilin, 541004, China.

\* Corresponding author. E-mail: niuwx@ciac.ac.cn

## EXPERIMENTAL DETAILS

**1 Materials.** Palladium(II) chloride ( $\text{PdCl}_2$ ) and L-ascorbic acid (AA) were obtained from Sigma-Aldrich. Silver nitrate ( $\text{AgNO}_3$ ) was obtained from Sinopharm Chemical Reagent Co., Ltd. Cetyltrimethylammonium bromide (CTAB) was obtained from Acros Organics. Hydrochloric acid (HCl, 37.5%) was obtained from Beijing Chemical Works. Commercial Pd/C (10 wt. %) was purchased from Alfa Aesar. Ultrapure de-ionized water was used throughout the experiments.

**2 Synthesis of Pd Cubic Seeds.** The cubic seeds were synthesized according to previously reported protocols. To prepare a 10 mM  $\text{H}_2\text{PdCl}_4$  solution, 0.1773 g  $\text{PdCl}_2$  was added in 10 mL of 0.2 M HCl solution and the mixture was heated at 60 °C until all the solids were dissolved, then the solution was further diluted to 100 mL with water. To synthesize Pd cubic seeds, a vial containing 45.6 mg CTAB and 10 mL of water were heated at 95 °C with constant electromagnetic stirring for 5 min. Then 0.5 mL of 10 mM  $\text{H}_2\text{PdCl}_4$  solution was added. After another 5 min, 80  $\mu\text{L}$  of 0.1 M ascorbic acid solution was quickly injected. The mixture was further stirred for 10 min at 95 °C and finally stored at 30 °C for future use.

**3 Growth of Pd-based NCs in the presence of silver nitrate.** In a typical synthesis, 50 mL of 0.1 M CTAB solution was preheated in a 60 °C water bath for 10 min. Then, 0.25 mL 1 M HCl solution, 1.25 mL of 10 mM  $\text{H}_2\text{PdCl}_4$  solution, different amounts of 10 mM  $\text{AgNO}_3$  solution, and 0.4 mL of the as-synthesized Pd cubic seed solution were added and gently mixed, followed by the addition of 0.5 mL of 0.1 M ascorbic acid solution. The resulting solution was placed in a water bath at 60 °C without disturbance. After 12 h, the products were collected by centrifugation (12000 rpm, 5 min) and washed by water. The centrifugation was performed again, and the precipitates were re-dispersed in water for further characterization.

**4 Instrumentation.** Transmission electron microscopy (TEM) images, high-resolution TEM (HRTEM) images were acquired using a JEOL JEM-2100F TEM

operating at 200 kV. X-ray diffraction (XRD) patterns were obtained on a Bruker D8 Discover with GADDS and Cu K $\alpha$  radiation. Scanning electron microscopy (SEM) images were taken using a JEOL JSM-6700F microscope operating at 20 kV. X-ray photoelectron spectroscopy (XPS) was performed on a Kratos AXIS Hsi spectrometer using monochromatic Al K $\alpha$  X-ray source (1486.6 eV). C 1s at 284.5 eV was used as the charge reference to determine core level binding energies. Scanning transmission electron microscopy (STEM) and energy dispersive X-ray spectroscopy (EDX) data were obtained with a JEM-2010 apparatus operating at 200 kV. The element mole ratio of NCs was measured by inductively coupled plasma-atomic emission spectroscopy (ICP-AES) on a Thermo Scientific iCAP6300 instrument (Thermo Fisher Scientific, USA).

**5 Electrochemical measurements.** All the electrochemical measurements were conducted in a three-electrode system with CHI760E electrochemical workstation (CH Instruments, Instrument Corporation, China). Glassy carbon electrodes (GCE, 3.0 mm diameter) were used as the working electrode. Ag/AgCl electrode (saturated KCl) and Pt wire were used as the reference and counter electrodes, respectively. 1 mg of as-synthesized Pd NCs were dispersed in 0.5 mL of 20 vol.% isopropyl alcohol solution containing 0.1 wt.% Nafion. The mixture was then sonicated vigorously for 30 min to form a homogeneous suspension. Subsequently, 5  $\mu$ L of the above suspension was dropped on the GCE and used for electrochemical measurements after solvent evaporation. Accelerated durability test (ADT) was performed in N<sub>2</sub>-saturated 1.0 M KOH + 1.0 M CH<sub>3</sub>OH by continuous potentiodynamic swept between -0.8 and 0.2 V for 500 cycles at a scan rate of 50 mV s<sup>-1</sup>.

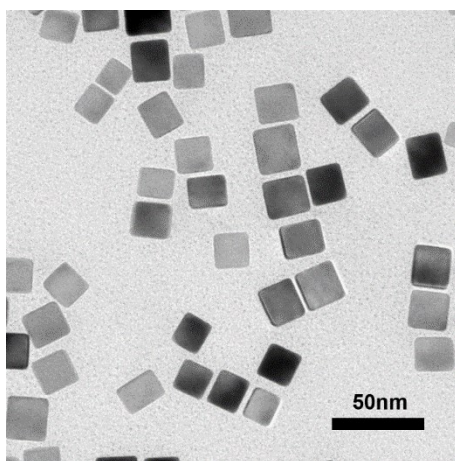

**Fig.S1.** TEM image of Pd cubic seeds (size ~22nm) for synthesis of Pd-based nanocrystals.

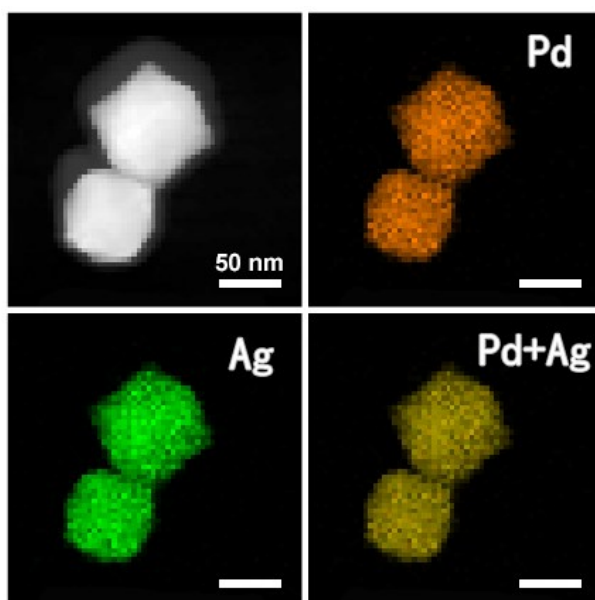

**Fig.S2.** STEM and EDX mapping images of Pd-Ag THH nanocrystals. (Ag(I)/Pd(II) precursor ratio of 0.32).

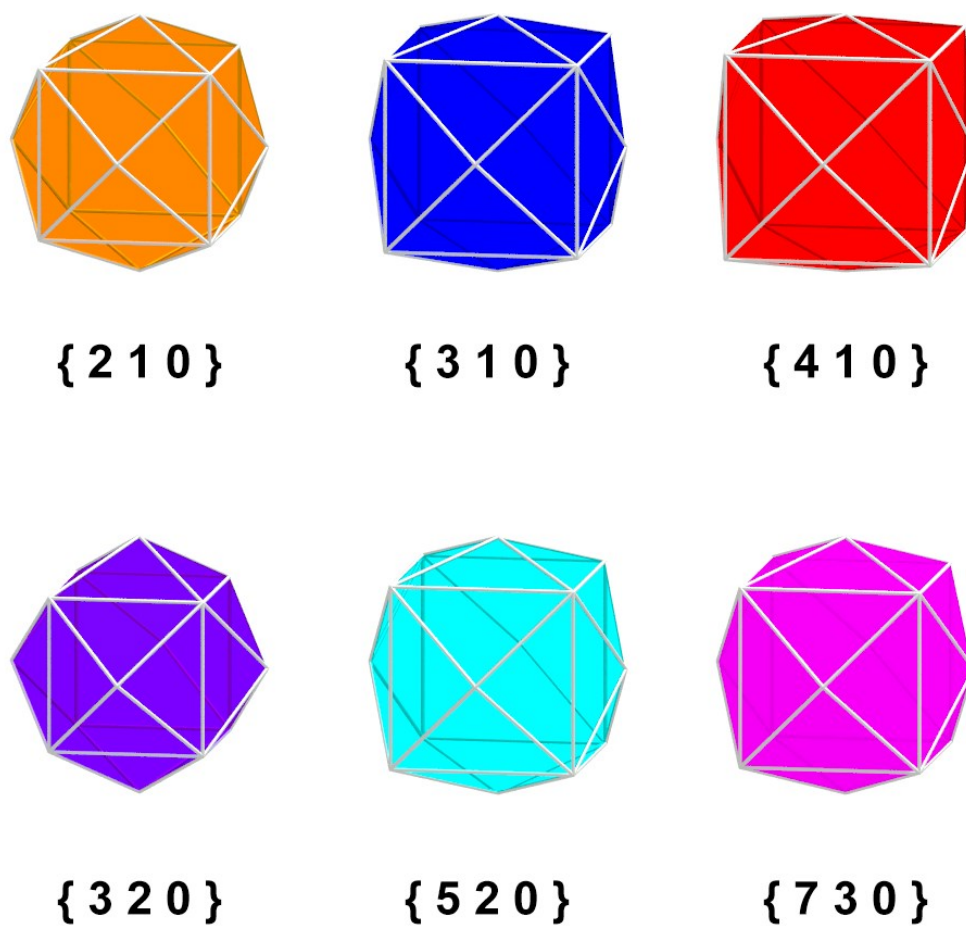

**Fig.S3.** Models of THH NCs enclosed by different  $\{hk0\}$  high-index facets ( $h>k>0$ ).

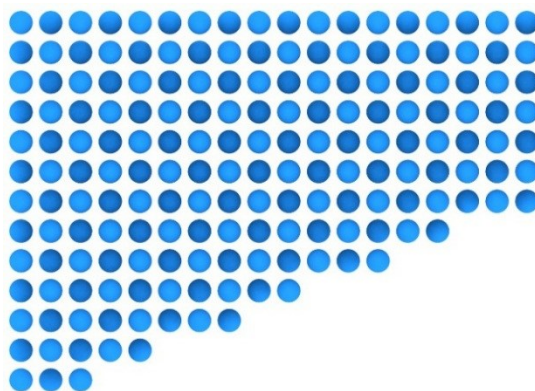

**Fig.S4.** Theoretical step configuration of  $\{520\}$  facets made of  $\{310\}$  and  $\{210\}$  sub-steps.

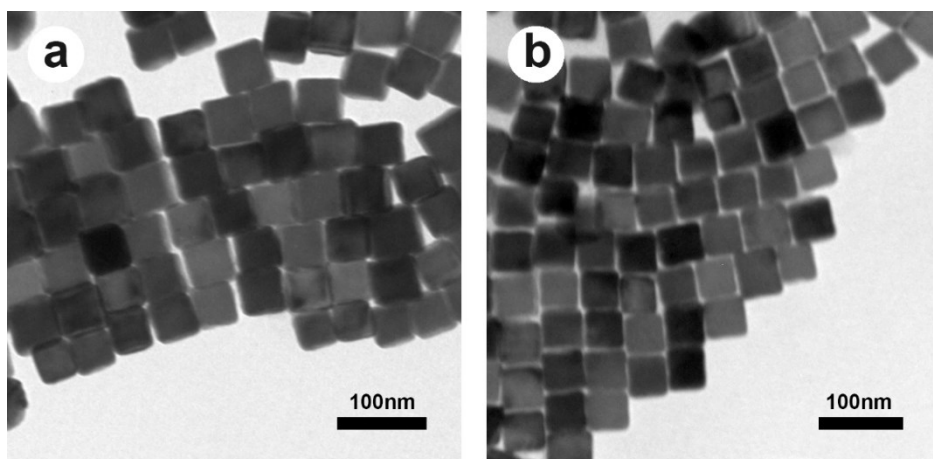

**Fig.S5.** TEM images of Pd-based nanocrystals before (a) and after (b) reaction in the absence of  $\text{H}_2\text{PdCl}_4$  precursor, other conditions are the same as the growth of the THH NCs. Pd nanocubes of  $\sim 50$  nm in size were used as seeds.

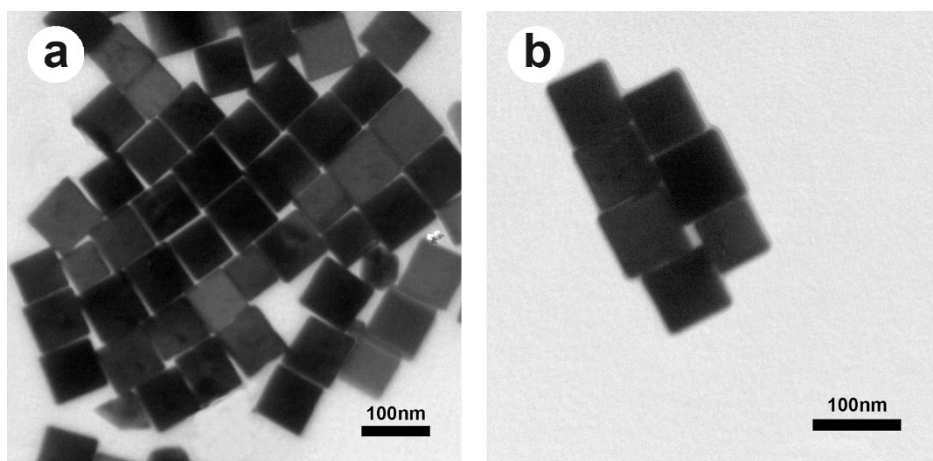

**Fig.S6.** Pd nanocubes with exposed  $\{100\}$  facets (size  $\sim 76$  nm) for electrochemistry measurements.

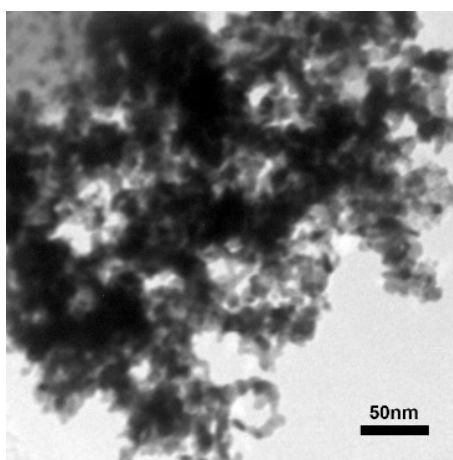

**Fig.S7.** TEM image of commercial Pd/C (10 wt.%) catalysts.

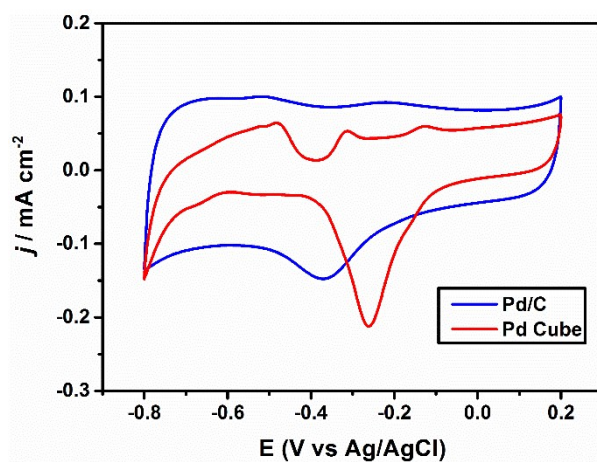

**Fig.S8.** CV curves of Pd nanocubes and Pd/C catalysts in 1.0 M KOH solution with a scan rate of  $50 \text{ mV s}^{-1}$ .

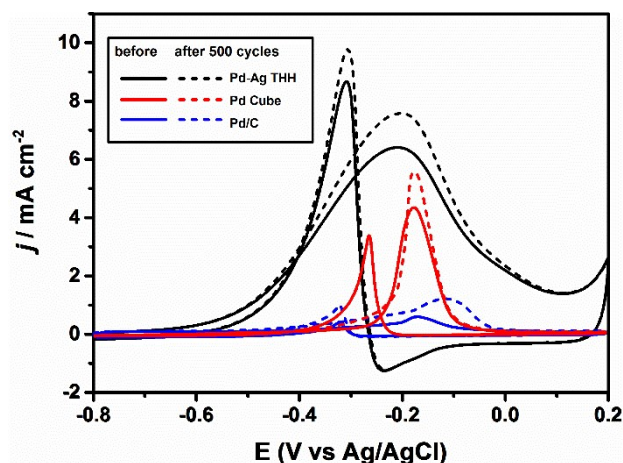

**Fig.S9.** CV curves of different samples before and after 500 cycles ADT in 1.0 M KOH+1.0 M  $\text{CH}_3\text{OH}$  solution with a scan rate of  $50 \text{ mV s}^{-1}$ .

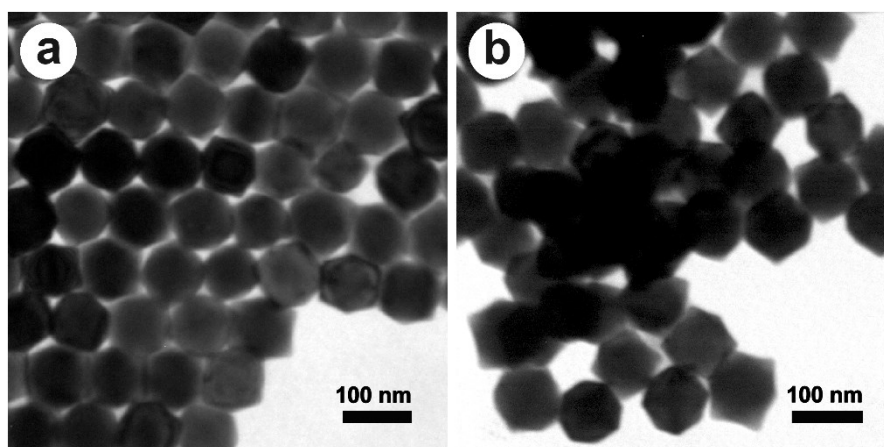

**Fig.S10.** TEM images of Pd-Ag THH NCs before (a) and after 500 cycles ADT (b) in 1.0 M KOH+1.0 M  $\text{CH}_3\text{OH}$  solution.

**Table S1.** ICP results of Pd-based NCs synthesized with different ratios of Ag(I)/Pd(II) precursors.

| Ag(I)/Pd(II)<br>precursor ratio | Mass percentage<br>of Ag (%) | Molar percentage<br>of Ag (%) | Corresponding<br>morphology |
|---------------------------------|------------------------------|-------------------------------|-----------------------------|
| 0                               | 0                            | 0                             | Cube                        |
| 0.04                            | 2.56                         | 2.53                          | Truncated cube              |
| 0.08                            | 4.63                         | 4.57                          | Truncated THH               |
| 0.16                            | 5.48                         | 5.42                          | Slightly truncated THH      |
| 0.32                            | 6.96                         | 6.88                          | THH                         |
| 0.64                            | 8.26                         | 8.15                          | THH                         |
| 0.96                            | 9.76                         | 9.64                          | THH                         |
| 1.28                            | 11.75                        | 11.61                         | THH                         |

**Table S2.** Projections from [001] direction and corresponding geometrical parameters of THH NCs bounded by {hk0} facets ( $h > k > 0$ ).

| Projection<br>image                                                                 | Surface facets | Projection degree      |                |
|-------------------------------------------------------------------------------------|----------------|------------------------|----------------|
|                                                                                     |                | $\alpha$               | $\beta$        |
| 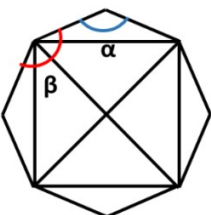 | {3 2 0}        | 112.62                 | 157.38         |
|                                                                                     | {2 1 0}        | 126.87                 | 143.13         |
|                                                                                     | {7 3 0}        | 133.60                 | 136.40         |
|                                                                                     | <b>{5 2 0}</b> | <b>136.40</b>          | <b>133.60</b>  |
|                                                                                     | {3 1 0}        | 143.13                 | 126.87         |
|                                                                                     | {4 1 0}        | 151.93                 | 118.07         |
|                                                                                     | {h k 0}        | $2 \cdot \arctan(h/k)$ | $270 - \alpha$ |
